# Supplementary material for: Sterically congested pyrrole-fused tetrathiafulvalene decamers as highly conductive amorphous molecular materials
Source: Royal Society of Chemistry journal article supplement (doi:10.1039/c2ra00035k), 2012-01-01
Supplement: c2ra00035k.pdf [file c2ra00035k.pdf]

## Supplementary Information

### Sterically Congested Pyrrole-Fused Tetrathiafulvalene Decamers as Highly Conductive Amorphous Molecular Materials

Masayoshi Takase,\* Naofumi Yoshida, Tomoyuki Narita, Takashi Fujio, Tohru Nishinaga, and  
Masahiko Iyoda\*

*Department of Chemistry, Graduate School of Science and Engineering, Tokyo Metropolitan  
University, Hachioji, Tokyo 192-0397, Japan,  
E-mail: mtakase@tmu.ac.jp, iyoda@tmu.ac.jp*

#### Contents

|                                                                                      |         |
|--------------------------------------------------------------------------------------|---------|
| S1. Material and methods                                                             | … p.S2  |
| S2. <sup>1</sup> H and <sup>13</sup> C NMR spectra                                   | … p.S4  |
| S3. Chemical oxidations of <b>4b</b>                                                 | … p.S6  |
| S4. XRD patterns and SEM images of self-assembled <b>4b</b> and their conductivities | … p.S7  |
| S5. Single crystal structure of <b>5</b>                                             | … p.S8  |
| S6. DFT calculations of decafluorobiphenyl and <b>4b</b>                             | … p.S10 |
| S9. References                                                                       | … p.S14 |

## S1. Material and methods

$^1\text{H}$  and  $^{13}\text{C}$  NMR spectra were recorded on Bruker 500 spectrometer with use of tetramethylsilane proton or carbon signal as an internal standard. Electron impact (EI) mass spectra and laser desorption ionization time-of-flight (LDI-TOF) mass spectra were obtained on SHIMADZU GC-MS QP2020 and AXIMA-CFR, respectively. Melting points were determined with Yanako MP-500D and not corrected. Elemental analyses were performed with Exeter Analytical, Inc. CE-440F. Column chromatography was carried out using Merck silica gel 60, Daiso silica gel 1001W, or neutral alumina activity II-III, 70-230 mesh ASTM. Gel permeation chromatography (GPC) was performed using a JAI model LC-908 recycling preparative HPLC equipped with JAIGEL-1H-40 and -2H-40 columns (40 x 600 mm) with toluene as eluent. Differential scanning calorimetry (DSC) and thermogravimetric analysis (TGA) was carried out with Rigaku DSC8230L under nitrogen atmosphere. Absorption spectra were recorded on SHIMADZU UV-Vis-NIR scanning spectrophotometer (Model UV-3101-PC). Cyclic voltammetry (CV) and differential pulse voltammetry (DPV) measurements were performed on BAS-ALS620B electrochemical analyzer using a standard three-electrode cell consisting of Pt working electrodes, a Pt wire counter electrode, and a Ag/AgNO<sub>3</sub> reference electrode under nitrogen atmosphere. The potentials were calibrated with ferrocene as an external standard. Atomic force field microscopy (AFM) and scanning electronic microscopy (SEM) measurements were carried out with KEYENCE, Nanoscale Hybrid Microscope VN-8000 (tapping mode) and KEYENCE VE-9800, respectively. Electric conductivity measurements were performed with Advantest R6551 Digital Multimeter. All reactions were carried out under nitrogen atmosphere. THF was freshly distilled from sodium benzophenone ketyl before use, and other solvents were purified with standard methods.

## Synthetic Methods

### **Decakis[2-(4,5-bis(butylthio)-1,3-dithiol-2-ylidene)-(1,3)-dithiolo[4,5-*c*]-*N*-pyrrolyl]biphenyl (4b)**

To a DMF-THF (5 + 5 mL) solution of **6** (303 mg 0.72 mmol) was added NaH (60% oil dispersion, 33 mg, 0.83 mmol) at 0 °C. After stirring for 30 min at the same temperature, decafluorobiphenyl (12 mg, 0.36 mmol) was added. The reaction mixture was allowed to warm to room temperature over 9 hours, and then it was heated up to 70 °C and stirred for 3 hours. After addition of H<sub>2</sub>O, the aqueous phase was extracted by THF, and then combined organic phase was washed with brine, and dried over MgSO<sub>4</sub>. Concentration in vacuo gave a dark oil, which was subjected to column chromatography (Al<sub>2</sub>O<sub>3</sub>; eluent, CH<sub>2</sub>Cl<sub>2</sub>) and GPC (eluent, toluene), and re-crystallized from CH<sub>2</sub>Cl<sub>2</sub> and hexane to give **4b** as a dark-yellow solid in 44% yield (67 mg, 0.016 mmol). dec. > 226 °C;  $^1\text{H}$  NMR (500 MHz,

CDCl<sub>3</sub>)  $\delta$  5.98 (s, 4H), 5.86 (s, 8H), 5.65 (s, 8H), 2.84-2.79 (t,  $J$  = 7.3 Hz, 40H), 1.68-1.58 (m, 40H), 1.44-1.39 (m, 40H), 0.97-0.89 (m, 60H); <sup>13</sup>C NMR (125 MHz, CDCl<sub>3</sub>)  $\delta$  132.35, 127.64, 127.52, 126.56, 125.17, 124.96, 124.42, 117.70, 117.46, 115.18, 114.86, 112.27, 112.15, 111.99, 111.72, 111.66, 36.04, 35.99, 31.76, 21.73, 21.70, 21.67, 13.68, 13.64; UV-vis (CH<sub>2</sub>Cl<sub>2</sub>/CH<sub>3</sub>CN 2:1)  $\lambda_{\text{max}}$  nm (log  $\epsilon$ ) 298 (4.65), 322 (4.59), 370 (4.21); LDI-TOF-MS: calcd for MH<sup>+</sup>, C<sub>172</sub>H<sub>200</sub>N<sub>10</sub>S<sub>60</sub>: 4329.9; found 4331.5. Anal. Calcd for C<sub>172</sub>H<sub>200</sub>N<sub>10</sub>S<sub>60</sub>: C, 47.69; H, 4.65; N, 3.23. Found: C, 47.98; H, 4.72; N, 3.20.

### **Decakis(*N*-pyrrolyl)biphenyl (5)**

To a DMF (20 mL) solution of pyrrole (679 mg 10.0 mmol) was added NaH (60% oil dispersion, 420 mg, 10.5 mmol) at 0 °C. After stirring for 30 min at the same temperature, decafluorobiphenyl (167 mg, 0.50 mmol) was added. The reaction mixture was heated up to 80 °C and stirred for overnight. After addition of H<sub>2</sub>O, the aqueous phase was extracted by ether, and then combined organic phase was washed with brine, and dried over MgSO<sub>4</sub>. Concentration in vacuo gave a pale-yellow solid, which was subjected to column chromatography (SiO<sub>2</sub>; eluent, Hexane: CH<sub>2</sub>Cl<sub>2</sub> = 2: 3) and crystallized from CH<sub>2</sub>Cl<sub>2</sub> and hexane to give **5** as colorless prisms in 96% yield (378 mg, 0.47 mmol). dec. > 311 °C; <sup>1</sup>H NMR (500 MHz, CDCl<sub>3</sub>)  $\delta$  6.08 (dd,  $J$  = 2.1, 2.1 Hz, 4H), 6.03-5.98 (m, 28H), 5.96 (dd,  $J$  = 2.2, 2.2 Hz, 8H); <sup>13</sup>C NMR (125 MHz, CDCl<sub>3</sub>)  $\delta$  136.89, 136.46, 133.53, 127.57, 121.46, 120.87(2C), 110.55, 110.40, 109.86; EI-MS: calcd for M<sup>+</sup>, C<sub>52</sub>H<sub>40</sub>N<sub>10</sub>: 804.3; found 804.; Anal. Calcd for C<sub>52</sub>H<sub>40</sub>N<sub>10</sub>: C, 77.59; H, 5.01; N, 17.40. Found: C, 77.20; H, 4.74; N, 17.22.

## S2. $^1\text{H}$ and $^{13}\text{C}$ NMR spectra

Figure S2-1.  $^1\text{H}$  NMR of **4b** ( $\text{CDCl}_3$ , 500 MHz)

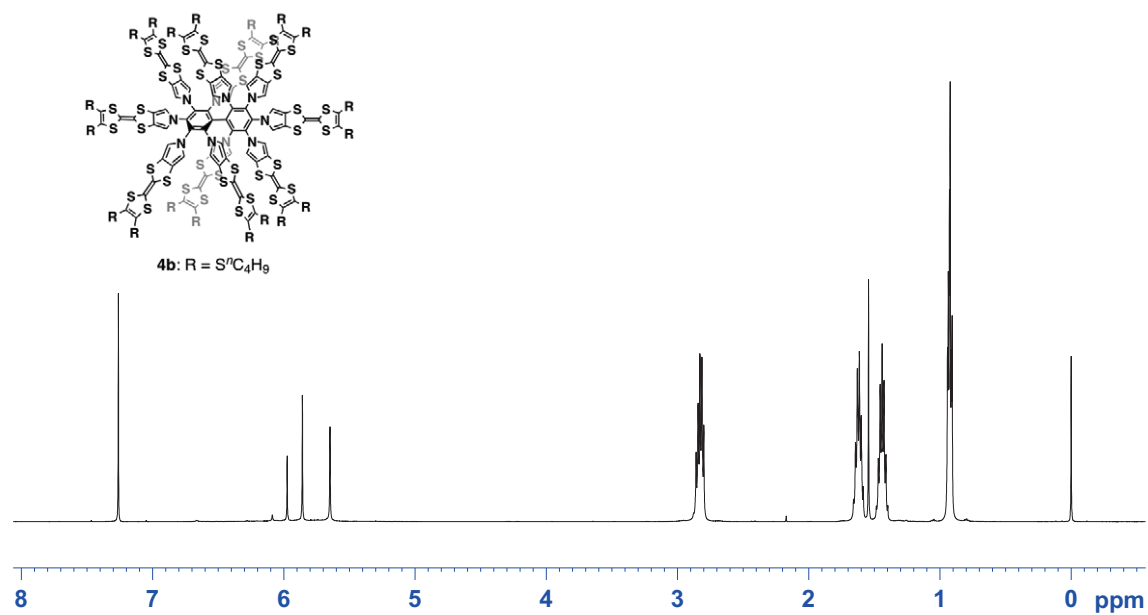

Figure S2-2.  $^{13}\text{C}$  NMR of **4b** ( $\text{CDCl}_3$ , 125 MHz)

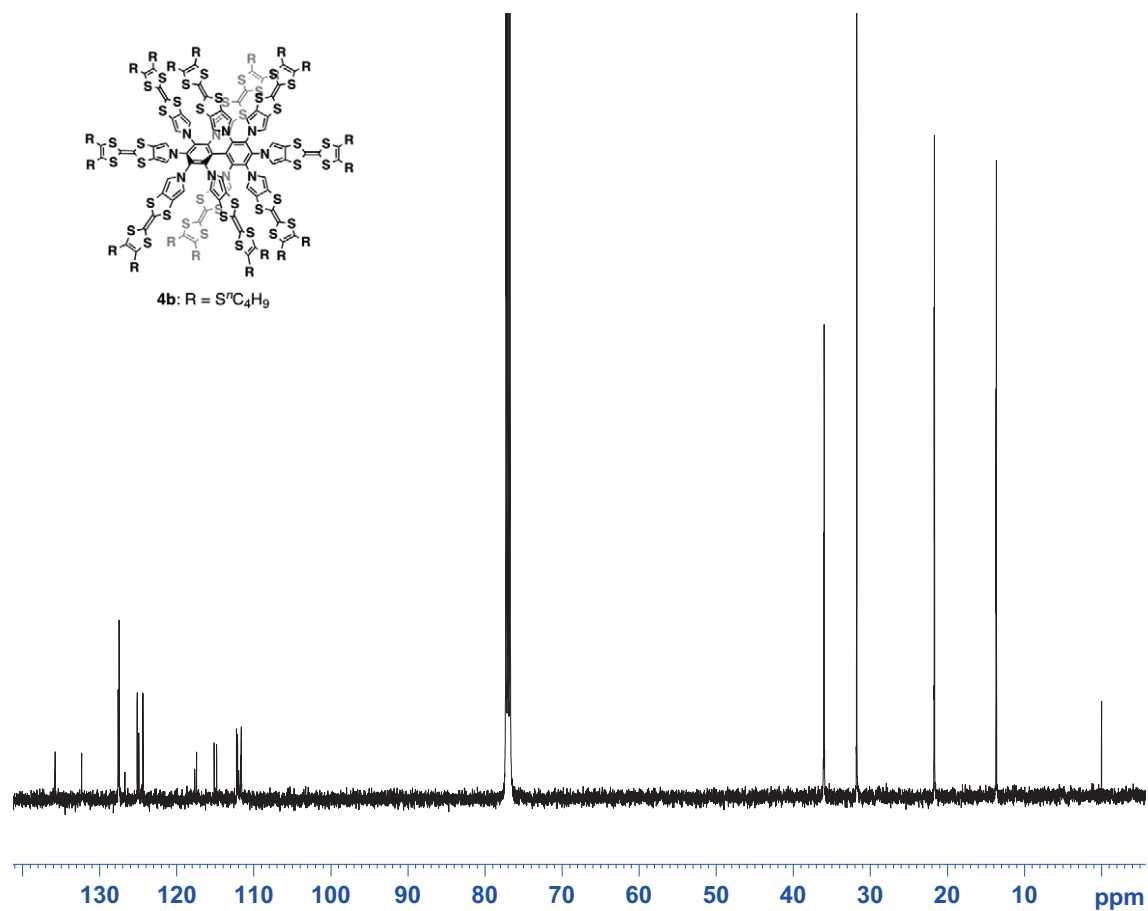

**Figure S2-3.**  $^1\text{H}$  NMR of **5** ( $\text{CDCl}_3$ , 500 MHz)

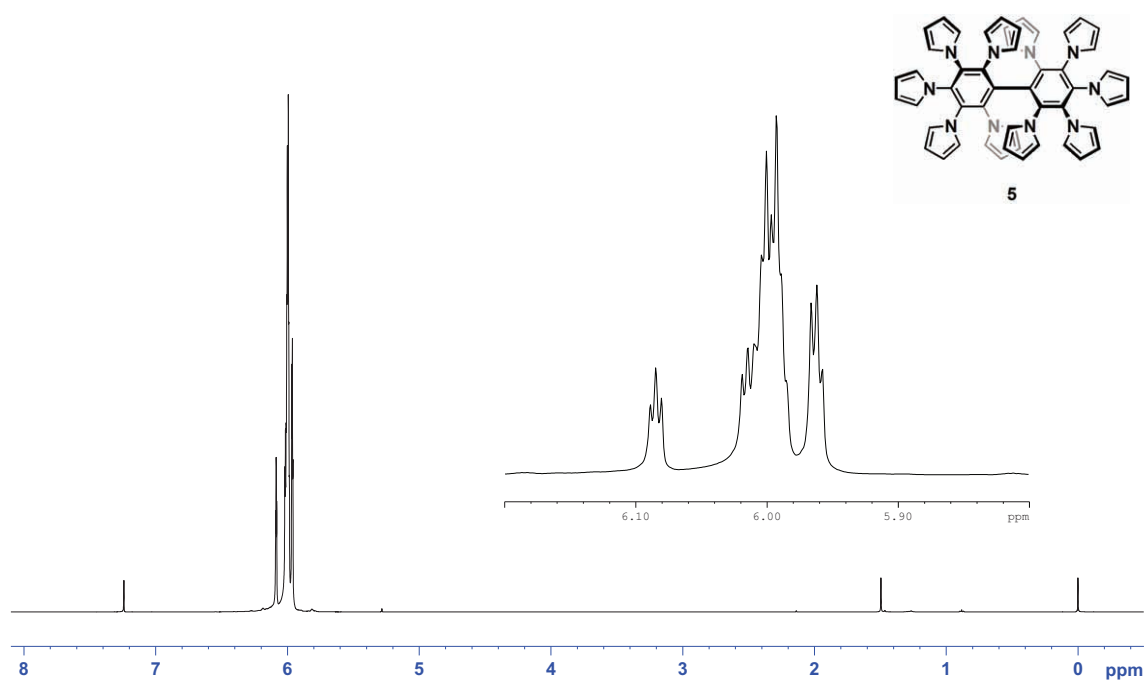

**Figure S2-4.**  $^{13}\text{C}$  NMR of **5** ( $\text{CDCl}_3$ , 125 MHz)

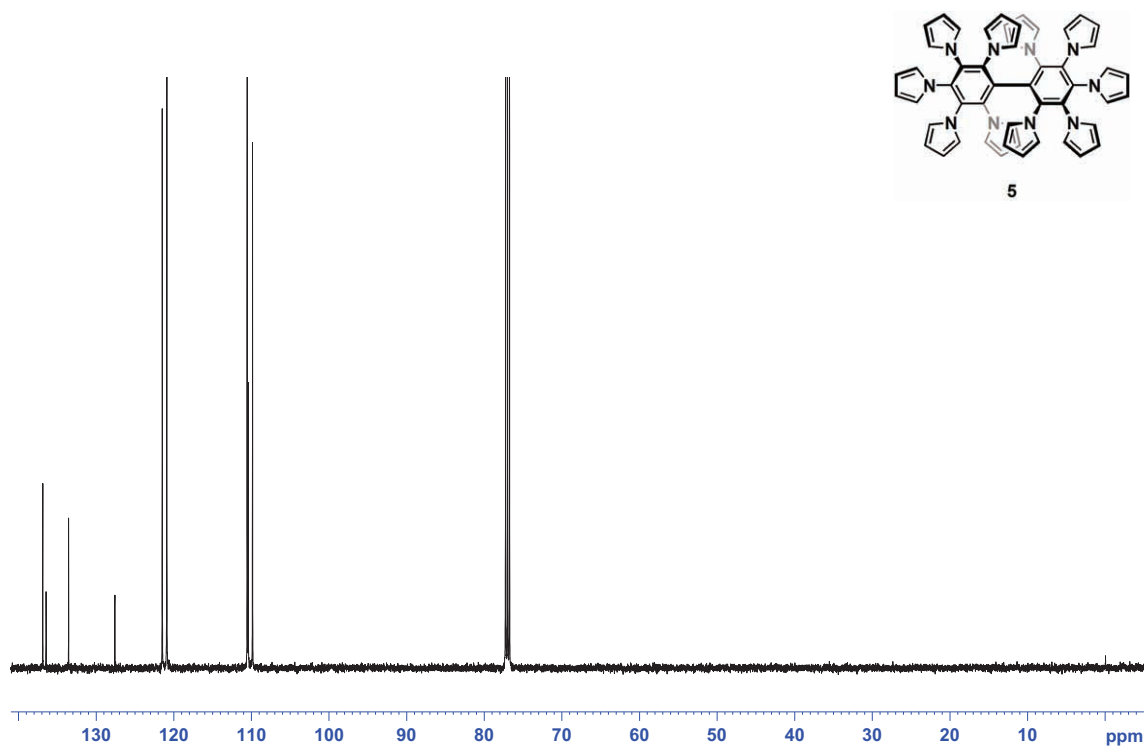

### S3. Chemical oxidations of **4b**

**Figure S3-1.** Absorption spectra of **4b** (0.02 mM) in the presence of various amount of oxidant,  $\text{Fe}(\text{ClO}_4)_3 \cdot 6\text{H}_2\text{O}$  in a mixture of  $\text{CH}_2\text{Cl}_2$  and  $\text{CH}_3\text{CN}$  (2:1, v/v) at room temperature.

(a) **4b**  $\rightarrow$  **4b**<sup>10(+)</sup>

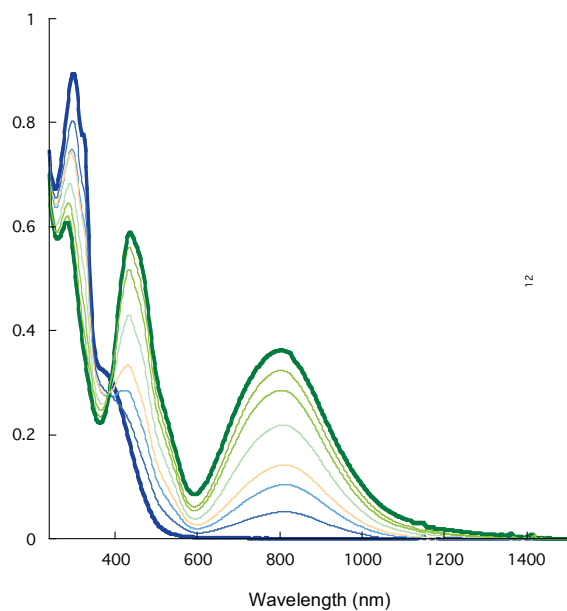

(b) **4b**<sup>10(+)</sup>  $\rightarrow$  **4b**<sup>10(2+)</sup>

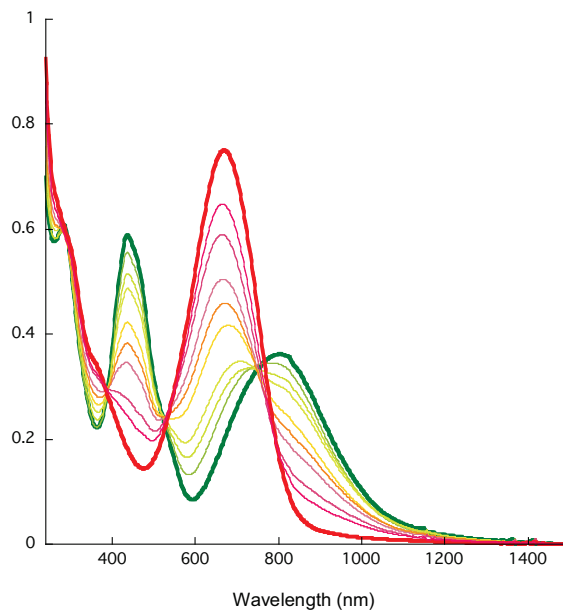

#### S4. XRD patterns and SEM images of self-assembled 4b and their conductivities

**Figure S4-1.** (a) SEM images and (b) XRD patterns of **4b-particle**. For SEM measurements, the samples were prepared by casting a suspension of nanostructures onto a cleaned Si wafer, followed by drying. The conductivities for these assembled structures were *measured by two-probe technique* using fine gold wires (10  $\mu\text{m}$  diameter) attached to the pellets made of fibers, particles or films with carbon paste. Thickness of the pellets and spin coat films were estimated by AFM with tapping mode. The values are averages of two measurements by preparing different samples.

(a)

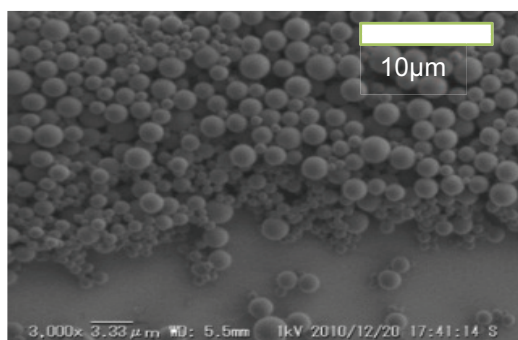

**4b-particle:** 5 mg/ml

( $\text{CH}_2\text{Cl}_2$  : hexane = 1:4, v/v)

$$\delta_{rt} = 7.8 \times 10^{-2} \text{ S/cm}$$

(after  $\text{I}_2$  dope)

(b)

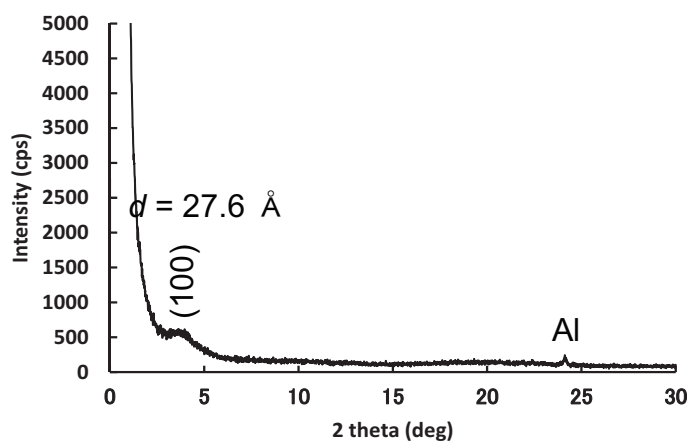

### S5. Single crystal structure of **5**

X-ray data were taken on a Bruker Smart APEX diffractometer equipped with a CCD area detector with graphite-monochromated MoK $\alpha$  radiation ( $\lambda = 0.71073 \text{ \AA}$ ). The structure was solved by direct methods (SHELXTL) and refined by the full-matrix least-squares method on  $F^2$  (SHELXL-97). Non-hydrogen atoms were refined anisotropically, and hydrogen atoms were placed using AFIX instructions.

**Figure S5-1.** ORTEP drawings of **5**.

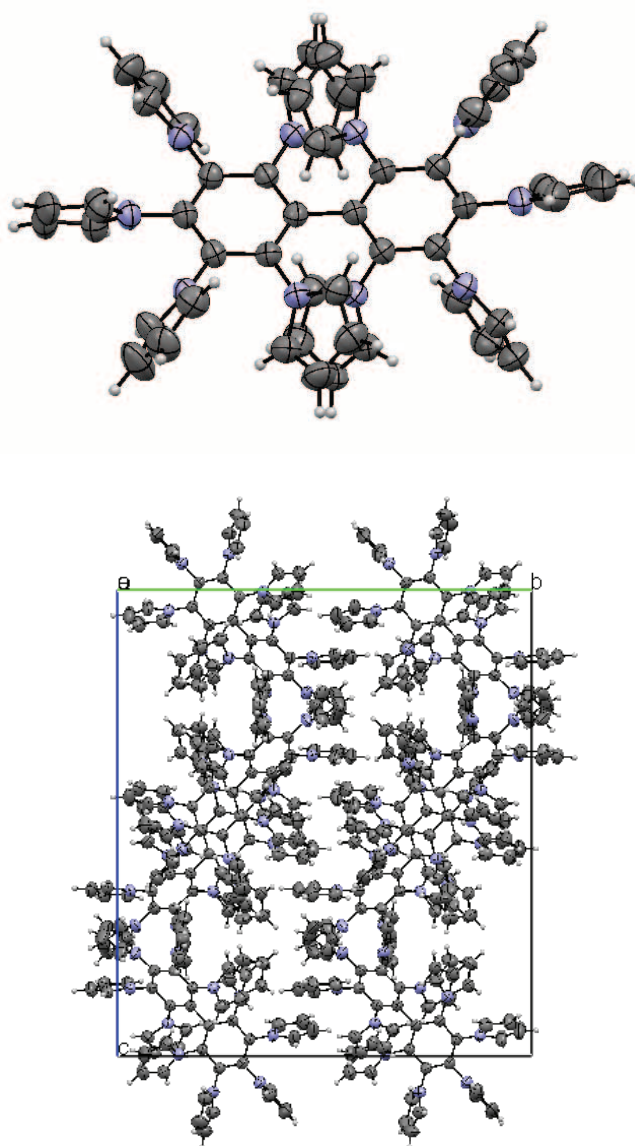



**Table S5-1.** Crystal data and structure refinement for **5**.

|                                   |                                                 |          |
|-----------------------------------|-------------------------------------------------|----------|
| Identification code               | <b>5</b>                                        |          |
| Empirical formula                 | C <sub>52</sub> H <sub>40</sub> N <sub>10</sub> |          |
| Formula weight                    | 804.94                                          |          |
| Temperature                       | 293(2) K                                        |          |
| Wavelength                        | 0.71073 Å                                       |          |
| Crystal system                    | orthorhombic                                    |          |
| Space group                       | Pbca                                            |          |
| Unit cell dimensions              | a = 14.853(3) Å                                 | α = 90°. |
|                                   | b = 22.747(3) Å                                 | β = 90°. |
|                                   | c = 25.640(4) Å                                 | γ = 90°. |
| Volume                            | 8663(2) Å <sup>3</sup>                          |          |
| Z                                 | 8                                               |          |
| Density (calculated)              | 1.234 Mg/m <sup>3</sup>                         |          |
| Absorption coefficient            | 0.076 mm <sup>-1</sup>                          |          |
| F(000)                            | 3376                                            |          |
| Crystal size                      | 0.40 x 0.20 x 0.30 mm <sup>3</sup>              |          |
| Theta range for data collection   | 1.59 to 23.28°.                                 |          |
| Index ranges                      | -16 ≤ h ≤ 16, -25 ≤ k ≤ 22, -28 ≤ l ≤ 27        |          |
| Reflections collected             | 36688                                           |          |
| Independent reflections           | 6235 [R(int) = 0.0468]                          |          |
| Completeness to theta = 23.28°    | 99.8 %                                          |          |
| Absorption correction             | Empirical                                       |          |
| Refinement method                 | Full-matrix least-squares on F <sup>2</sup>     |          |
| Data / restraints / parameters    | 6235 / 0 / 559                                  |          |
| Goodness-of-fit on F <sup>2</sup> | 1.035                                           |          |
| Final R indices [I > 2σ(I)]       | R1 = 0.0431, wR2 = 0.1172                       |          |
| R indices (all data)              | R1 = 0.0686, wR2 = 0.1430                       |          |
| Largest diff. peak and hole       | 0.151 and -0.214 e.Å <sup>-3</sup>              |          |

## S6. DFT calculations of decafluorobiphenyl and **4a**<sup>[1]</sup>

The optimizations were performed with  $D_2$  symmetry for **4a** at the RB3LYP/6-31G (d) level of theory.

**Figure S6-1.** (a) LUMO of decafluorobiphenyl, and (b) optimized structure and (c) HOMO and LUMOs of **4a**.

(a) LUMO of decafluorobiphenyl

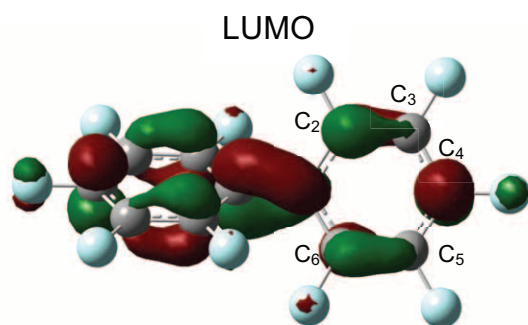

Dihedral angle between pentafluorophenyl groups:  $54^\circ$

According to the LUMO of decafluorobiphenyl, the orbitals are preferentially located at the *ortho*- and *para*-positions ( $C_2$ ,  $C_2'$ ,  $C_4$ , and  $C_4'$ ), indicating that the  $S_NAr$  reactions at these positions are favorable. However, once less hindered positions of the biphenyl moiety, *i.e.*,  $C_3$ ,  $C_3'$ ,  $C_4$ ,  $C_4'$ ,  $C_5$ , and  $C_5'$ , are substituted, complete substitution at the *ortho*-positions, *i.e.*,  $C_2$ ,  $C_2'$ ,  $C_6$ , and  $C_6'$ , is hampered in the case with bulky substituent **6**, even at higher temperatures.

(b) Optimized structure of **4a**

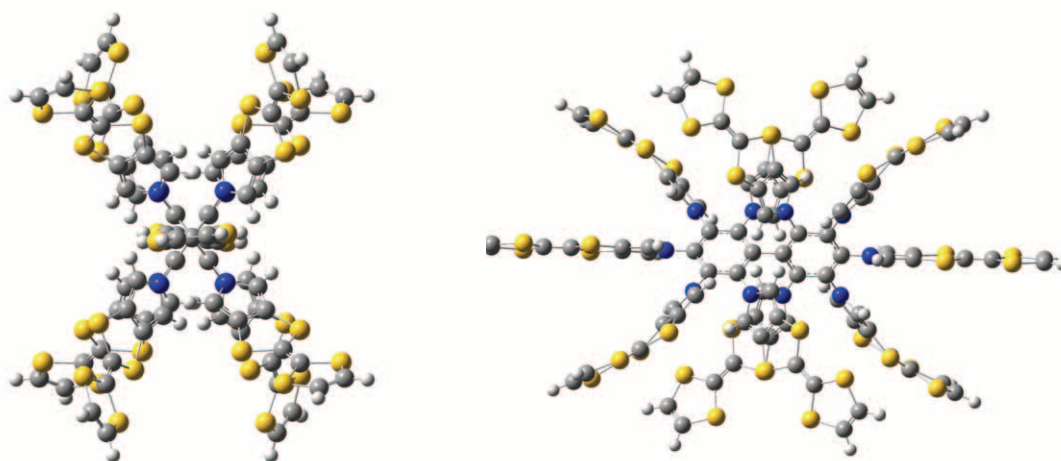

Dihedral angle between the phenyl groups:  $71^\circ$

(c) Molecular orbitals of **4a**

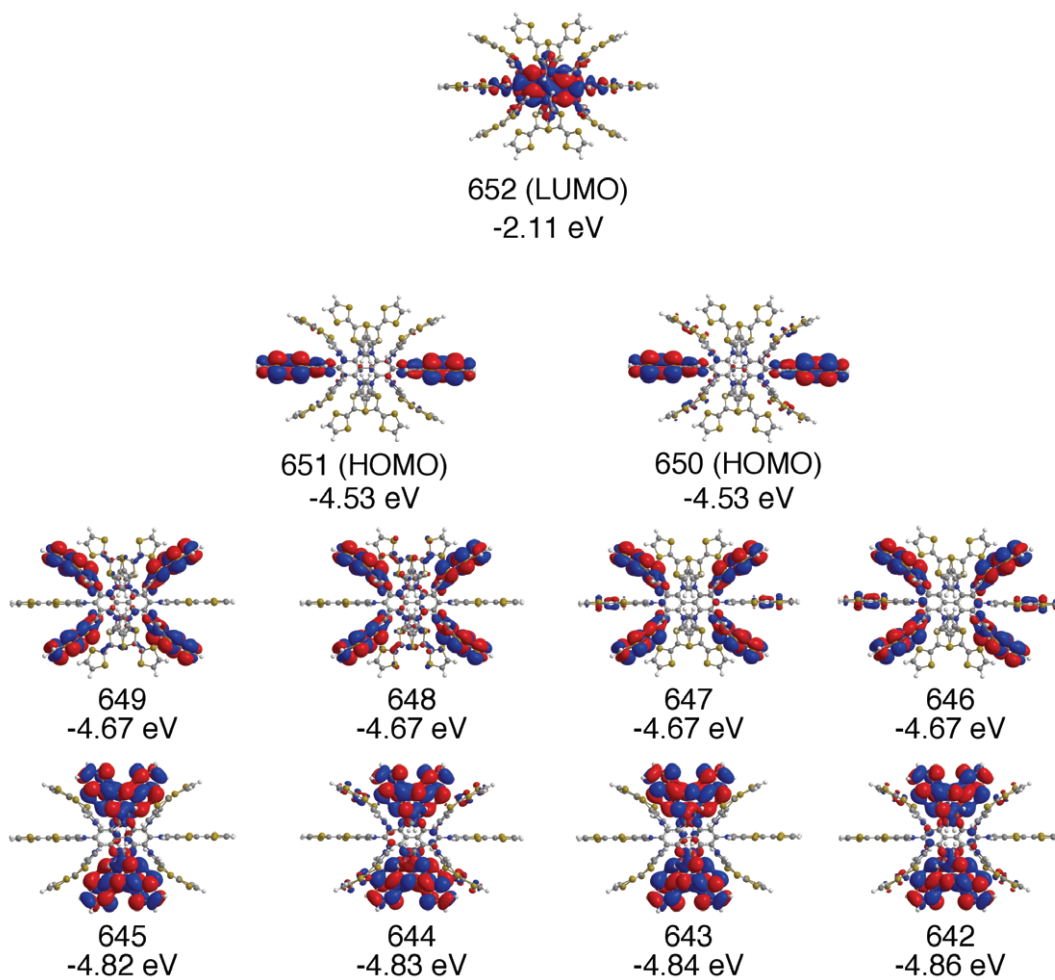

**Table S8-1.** Atomic coordination of **4a** ( $D_2$  symmetry)

| Center Number | Atomic Number | Coordinates (Angstroms) |           |           |
|---------------|---------------|-------------------------|-----------|-----------|
|               |               | X                       | Y         | Z         |
| 1             | 6             | 0.000000                | 0.000000  | 0.750307  |
| 2             | 6             | -0.711951               | 0.990036  | 1.462852  |
| 3             | 6             | -0.735648               | 0.974842  | 2.875487  |
| 4             | 6             | 0.000000                | 0.000000  | 3.579419  |
| 5             | 6             | 0.735648                | -0.974842 | 2.875487  |
| 6             | 6             | 0.711951                | -0.990036 | 1.462852  |
| 7             | 6             | 0.000000                | 0.000000  | -0.750307 |
| 8             | 6             | -0.711951               | -0.990036 | -1.462852 |
| 9             | 6             | -0.735648               | -0.974842 | -2.875487 |
| 10            | 6             | 0.000000                | 0.000000  | -3.579419 |
| 11            | 6             | 0.735648                | 0.974842  | -2.875487 |
| 12            | 6             | 0.711951                | 0.990036  | -1.462852 |
| 13            | 7             | 0.000000                | 0.000000  | 4.993587  |
| 14            | 6             | -1.132254               | -0.116620 | 5.797075  |
| 15            | 6             | 1.132254                | 0.116620  | 5.797075  |
| 16            | 6             | -0.709424               | -0.074009 | 7.100603  |
| 17            | 1             | -2.117344               | -0.189348 | 5.363811  |
| 18            | 6             | 0.709424                | 0.074009  | 7.100603  |
| 19            | 1             | 2.117344                | 0.189348  | 5.363811  |
| 20            | 16            | -1.515265               | -0.154121 | 8.660325  |
| 21            | 16            | 1.515265                | 0.154121  | 8.660325  |
| 22            | 6             | 0.000000                | 0.000000  | 9.609790  |
| 23            | 6             | 0.000000                | 0.000000  | 10.959239 |
| 24            | 16            | -1.490085               | -0.158032 | 11.936945 |
| 25            | 16            | 1.490085                | 0.158032  | 11.936945 |
| 26            | 7             | -1.480896               | 1.942837  | 3.589179  |
| 27            | 6             | -0.959351               | 2.839772  | 4.519266  |
| 28            | 6             | -2.857057               | 2.132919  | 3.480626  |
| 29            | 6             | -2.004756               | 3.593955  | 4.985394  |
| 30            | 1             | 0.089035                | 2.830833  | 4.773372  |
| 31            | 6             | -3.195573               | 3.149732  | 4.334979  |
| 32            | 1             | -3.448049               | 1.545139  | 2.795797  |
| 33            | 16            | -2.163046               | 4.943186  | 6.106949  |
| 34            | 16            | -4.685550               | 4.004543  | 4.723751  |
| 35            | 6             | -3.954683               | 4.867697  | 6.115152  |
| 36            | 6             | -4.700099               | 5.454996  | 7.075027  |
| 37            | 16            | -3.994850               | 6.354003  | 8.448513  |
| 38            | 16            | -6.486660               | 5.420473  | 7.084857  |
| 39            | 7             | 1.480896                | -1.942837 | 3.589179  |
| 40            | 6             | 0.959351                | -2.839772 | 4.519266  |
| 41            | 6             | 2.857057                | -2.132919 | 3.480626  |
| 42            | 6             | 2.004756                | -3.593955 | 4.985394  |
| 43            | 1             | -0.089035               | -2.830833 | 4.773372  |
| 44            | 6             | 3.195573                | -3.149732 | 4.334979  |
| 45            | 1             | 3.448049                | -1.545139 | 2.795797  |
| 46            | 16            | 2.163046                | -4.943186 | 6.106949  |
| 47            | 16            | 4.685550                | -4.004543 | 4.723751  |
| 48            | 6             | 3.954683                | -4.867697 | 6.115152  |
| 49            | 6             | 4.700099                | -5.454996 | 7.075027  |
| 50            | 16            | 3.994850                | -6.354003 | 8.448513  |
| 51            | 16            | 6.486660                | -5.420473 | 7.084857  |
| 52            | 7             | 1.405379                | -2.023539 | 0.776464  |
| 53            | 6             | 1.248528                | -3.383926 | 1.032351  |
| 54            | 6             | 2.390561                | -1.855898 | -0.201009 |
| 55            | 6             | 2.118789                | -4.061884 | 0.221062  |
| 56            | 1             | 0.523328                | -3.734438 | 1.748412  |
| 57            | 6             | 2.838852                | -3.101965 | -0.551542 |
| 58            | 1             | 2.672142                | -0.881833 | -0.560967 |
| 59            | 16            | 2.527910                | -5.757769 | -0.032883 |
| 60            | 16            | 4.060327                | -3.721791 | -1.660142 |
| 61            | 6             | 3.471388                | -5.411777 | -1.517289 |
| 62            | 6             | 3.751186                | -6.355101 | -2.441672 |
| 63            | 16            | 3.198802                | -8.047977 | -2.308064 |
| 64            | 16            | 4.716419                | -6.031281 | -3.909317 |
| 65            | 7             | -1.405379               | 2.023539  | 0.776464  |
| 66            | 6             | -1.248528               | 3.383926  | 1.032351  |
| 67            | 6             | -2.390561               | 1.855898  | -0.201009 |
| 68            | 6             | -2.118789               | 4.061884  | 0.221062  |
| 69            | 1             | -0.523328               | 3.734438  | 1.748412  |
| 70            | 6             | -2.838852               | 3.101965  | -0.551542 |
| 71            | 1             | -2.672142               | 0.881833  | -0.560967 |
| 72            | 16            | -2.527910               | 5.757769  | -0.032883 |
| 73            | 16            | -4.060327               | 3.721791  | -1.660142 |
| 74            | 6             | -3.471388               | 5.411777  | -1.517289 |
| 75            | 6             | -3.751186               | 6.355101  | -2.441672 |
| 76            | 16            | -3.198802               | 8.047977  | -2.308064 |
| 77            | 16            | -4.716419               | 6.031281  | -3.909317 |
| 78            | 7             | -1.405379               | -2.023539 | -0.776464 |
| 79            | 6             | -2.390561               | -1.855898 | 0.201009  |
| 80            | 6             | -1.248528               | -3.383926 | -1.032351 |
| 81            | 6             | -2.838852               | -3.101965 | 0.551542  |
| 82            | 1             | -2.672142               | -0.881833 | 0.560967  |
| 83            | 6             | -2.118789               | -4.061884 | -0.221062 |
| 84            | 1             | -0.523328               | -3.734438 | -1.748412 |
| 85            | 16            | -4.060327               | -3.721791 | 1.660142  |
| 86            | 16            | -2.527910               | -5.757769 | 0.032883  |
| 87            | 6             | -3.471388               | -5.411777 | 1.517289  |
| 88            | 6             | -3.751186               | -6.355101 | 2.441672  |
| 89            | 16            | -4.716419               | -6.031281 | 3.909317  |
| 90            | 16            | -3.198802               | -8.047977 | 2.308064  |
| 91            | 7             | -1.480896               | -1.942837 | -3.589179 |
| 92            | 6             | -2.857057               | -2.132919 | -3.480626 |
| 93            | 6             | -0.959351               | -2.839772 | -4.519266 |
| 94            | 6             | -3.195573               | -3.149732 | -4.334979 |
| 95            | 1             | -3.448049               | -1.545139 | -2.795797 |
| 96            | 6             | -2.004756               | -3.593955 | -4.985394 |
| 97            | 1             | 0.089035                | -2.830833 | -4.773372 |
| 98            | 16            | -4.685550               | -4.004543 | -4.723751 |
| 99            | 16            | -2.163046               | -4.943186 | -6.106949 |
| 100           | 6             | -3.954683               | -4.867697 | -6.115152 |
| 101           | 6             | -4.700099               | -5.454996 | -7.075027 |
| 102           | 16            | -6.486660               | -5.420473 | -7.084857 |
| 103           | 16            | -3.994850               | -6.354003 | -8.448513 |
| 104           | 7             | 1.405379                | 2.023539  | -0.776464 |
| 105           | 6             | 2.390561                | 1.855898  | 0.201009  |
| 106           | 6             | 1.248528                | 3.383926  | -1.032351 |
| 107           | 6             | 2.838852                | 3.101965  | 0.551542  |
| 108           | 1             | 2.672142                | 0.881833  | 0.560967  |
| 109           | 6             | 2.118789                | 4.061884  | -0.221062 |
| 110           | 1             | 0.523328                | 3.734438  | -1.748412 |
| 111           | 16            | 4.060327                | 3.721791  | 1.660142  |
| 112           | 16            | 2.527910                | 5.757769  | 0.032883  |
| 113           | 6             | 3.471388                | 5.411777  | 1.517289  |
| 114           | 6             | 3.751186                | 6.355101  | 2.441672  |
| 115           | 16            | 4.716419                | 6.031281  | 3.909317  |
| 116           | 16            | 3.198802                | 8.047977  | 2.308064  |
| 117           | 7             | 1.480896                | 1.942837  | -3.589179 |
| 118           | 6             | 2.857057                | 2.132919  | -3.480626 |
| 119           | 6             | 0.959351                | 2.839772  | -4.519266 |
| 120           | 6             | 3.195573                | 3.149732  | -4.334979 |
| 121           | 1             | 3.448049                | 1.545139  | -2.795797 |
| 122           | 6             | 2.004756                | 3.593955  | -4.985394 |
| 123           | 1             | -0.089035               | 2.830833  | -4.773372 |
| 124           | 16            | 4.685550                | 4.004543  | -4.723751 |
| 125           | 16            | 2.163046                | 4.943186  | -6.106949 |
| 126           | 6             | 3.954683                | 4.867697  | -6.115152 |
| 127           | 6             | 4.700099                | 5.454996  | -7.075027 |
| 128           | 16            | 6.486660                | 5.420473  | -7.084857 |

|     |    |           |           |            |     |   |           |           |            |
|-----|----|-----------|-----------|------------|-----|---|-----------|-----------|------------|
| 129 | 16 | 3.994850  | 6.354003  | -8.448513  | 157 | 6 | -6.637357 | 6.108090  | 8.701781   |
| 130 | 7  | 0.000000  | 0.000000  | -4.993587  | 158 | 1 | -7.635702 | 6.178067  | 9.117603   |
| 131 | 6  | 1.132254  | -0.116620 | -5.797075  | 159 | 6 | -4.369705 | 7.589841  | -4.659296  |
| 132 | 6  | -1.132254 | 0.116620  | -5.797075  | 160 | 1 | -4.744238 | 7.748762  | -5.663711  |
| 133 | 6  | 0.709424  | -0.074009 | -7.100603  | 161 | 6 | -3.691082 | 8.491290  | -3.942346  |
| 134 | 1  | 2.117344  | -0.189348 | -5.363811  | 162 | 1 | -3.434758 | 9.488127  | -4.281596  |
| 135 | 6  | -0.709424 | 0.074009  | -7.100603  | 163 | 6 | 3.691082  | 8.491290  | 3.942346   |
| 136 | 1  | -2.117344 | 0.189348  | -5.363811  | 164 | 1 | 3.434758  | 9.488127  | 4.281596   |
| 137 | 16 | 1.515265  | -0.154121 | -8.660325  | 165 | 6 | 4.369705  | 7.589841  | 4.659296   |
| 138 | 16 | -1.515265 | 0.154121  | -8.660325  | 166 | 1 | 4.744238  | 7.748762  | 5.663711   |
| 139 | 6  | 0.000000  | 0.000000  | -9.609790  | 167 | 6 | 5.523112  | 6.525692  | -9.311337  |
| 140 | 6  | 0.000000  | 0.000000  | -10.959239 | 168 | 1 | 5.487202  | 6.982929  | -10.293237 |
| 141 | 16 | 1.490085  | -0.158032 | -11.936945 | 169 | 6 | 6.637357  | 6.108090  | -8.701781  |
| 142 | 16 | -1.490085 | 0.158032  | -11.936945 | 170 | 1 | 7.635702  | 6.178067  | -9.117603  |
| 143 | 6  | 6.637357  | -6.108090 | 8.701781   | 171 | 6 | -0.664730 | 0.070735  | -13.490880 |
| 144 | 1  | 7.635702  | -6.178067 | 9.117603   | 172 | 1 | -1.280548 | 0.136144  | -14.380265 |
| 145 | 6  | 5.523112  | -6.525692 | 9.311337   | 173 | 6 | 0.664730  | -0.070735 | -13.490880 |
| 146 | 1  | 5.487202  | -6.982929 | 10.293237  | 174 | 1 | 1.280548  | -0.136144 | -14.380265 |
| 147 | 6  | -0.664730 | -0.070735 | 13.490880  | 175 | 6 | -5.523112 | -6.525692 | -9.311337  |
| 148 | 1  | -1.280548 | -0.136144 | 14.380265  | 176 | 1 | -5.487202 | -6.982929 | -10.293237 |
| 149 | 6  | 0.664730  | 0.070735  | 13.490880  | 177 | 6 | -6.637357 | -6.108090 | -8.701781  |
| 150 | 1  | 1.280548  | 0.136144  | 14.380265  | 178 | 1 | -7.635702 | -6.178067 | -9.117603  |
| 151 | 6  | -3.691082 | -8.491290 | 3.942346   | 179 | 6 | 4.369705  | -7.589841 | -4.659296  |
| 152 | 1  | -3.434758 | -9.488127 | 4.281596   | 180 | 1 | 4.744238  | -7.748762 | -5.663711  |
| 153 | 6  | -4.369705 | -7.589841 | 4.659296   | 181 | 6 | 3.691082  | -8.491290 | -3.942346  |
| 154 | 1  | -4.744238 | -7.748762 | 5.663711   | 182 | 1 | 3.434758  | -9.488127 | -4.281596  |
| 155 | 6  | -5.523112 | 6.525692  | 9.311337   |     |   |           |           |            |
| 156 | 1  | -5.487202 | 6.982929  | 10.293237  |     |   |           |           |            |

---

## S6. References

- [1] Gaussian 03, Revision E.01, Frisch, M. J.; Trucks, G. W.; Schlegel, H. B.; Scuseria, G. E.; Robb, M. A.; Cheeseman, J. R.; Montgomery, Jr., J. A.; Vreven, T.; Kudin, K. N.; Burant, J. C.; Millam, J. M.; Iyengar, S. S.; Tomasi, J.; Barone, V.; Mennucci, B.; Cossi, M.; Scalmani, G.; Rega, N.; Petersson, G. A.; Nakatsuji, H.; Hada, M.; Ehara, .; Toyota, K.; Fukuda, R.; Hasegawa, J.; Ishida, M.; Nakajima, T.; Honda, Y.; Kitao, O.; Nakai, H.; Klene, M.; Li, X.; Knox, J. E.; Hratchian, H. P.; Cross, J. B.; Bakken, V.; Adamo, C.; Jaramillo, J.; Gomperts, R.; Stratmann, R. E.; Yazyev, O.; Austin, A. J.; Cammi, R.; Pomelli, C.; Ochterski, J. W.; Ayala, P. Y.; Morokuma, K.; Voth, G. A.; Salvador, P.; Dannenberg, J. J.; Zakrzewski, V. G.; Dapprich, S.; Daniels, A. D.; Strain, M. C.; Farkas, O.; Malick, D. K.; Rabuck, A. D.; Raghavachari, K.; Foresman, J. B.; Ortiz, J. V.; Cui, Q.; Baboul, A. G.; Clifford, S.; Cioslowski, J.; Stefanov, B. B.; Liu, G.; Liashenko, A.; Piskorz, P.; Komaromi, I.; Martin, R. L.; Fox, D. J.; Keith, T.; Al-Laham, M. A.; Peng, C. Y.; Nanayakkara, A.; Challacombe, M.; Gill, P. M. W.; Johnson, B.; Chen, W.; Wong, M. W.; Gonzalez, C.; Pople, J. A. Gaussian, Inc., Wallingford CT, 2004.
